# Supplementary material for: Specificity of Multi-Modal Aphid Defenses against Two Rival Parasitoids
Source: PubMed Central journal article supplement (PMC4852904; doi:10.1371/journal.pone.0154670), 2016-05-02
Supplement: pone.0154670.s002.pdf [file pone.0154670.s002.pdf]

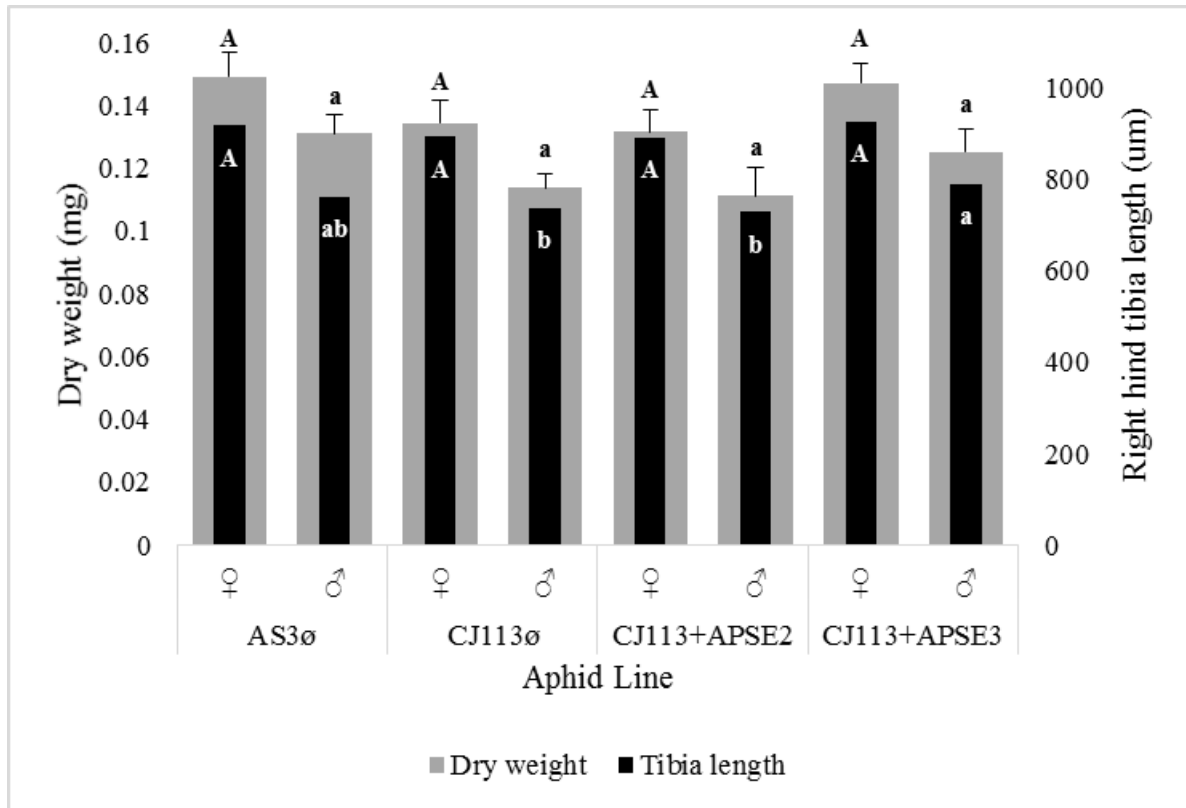

**S2 Fig. Fitness measures of adult *P. pequodorum* emerging from susceptible (AS3) and resistant (CJ113) aphid lines.** Dry weight,  $p = 0.2061_{\text{♀}} / 0.0687_{\text{♂}}$ . Tibial length,  $p = 0.1431_{\text{♀}} / 0.0015_{\text{♂}}$  (ANOVA). Letters indicate significance among females (capital letters) and among males (lowercase letters) (Tukey's HSD  $\alpha = 0.05$ ). Note: Error bars are for dry weight only.
