# Supplementary material for: Specificity of Multi-Modal Aphid Defenses against Two Rival Parasitoids
Source: PubMed Central journal article supplement (PMC4852904; doi:10.1371/journal.pone.0154670), 2016-05-02
Supplement: pone.0154670.s003.pdf [file pone.0154670.s003.pdf]

Note: The untransformed means are shown in figures 2 and 3 in the main text and Supplemental figure 1.

| Arcsine Transformed | Aphid line   | n | Mean    | Std. Dev. | Std. Err. Mean. | Lower 95% | Upper 95% |
|---------------------|--------------|---|---------|-----------|-----------------|-----------|-----------|
| Survival            | WI301-33     | 8 | 1.24809 | 0.25624   | 0.09059         | 1.0339    | 1.4623    |
|                     | AS3+APSE3    | 8 | 1.19465 | 0.118803  | 0.042           | 1.0953    | 1.294     |
|                     | WA4 $\phi$   | 8 | 1.18138 | 0.096499  | 0.03412         | 1.1007    | 1.2621    |
|                     | CJ113 $\phi$ | 8 | 1.05647 | 0.143278  | 0.05066         | 0.9367    | 1.1763    |
|                     | WI412-52     | 8 | 0.98831 | 0.109128  | 0.03858         | 0.8971    | 1.0795    |
|                     | AS3+APSE2    | 8 | 0.44982 | 0.179868  | 0.06359         | 0.2994    | 0.6002    |
|                     | G15 $\phi$   | 8 | 0.45142 | 0.079897  | 0.02825         | 0.3846    | 0.5182    |
|                     | AS3 $\phi$   | 8 | 0.16914 | 0.104392  | 0.03691         | 0.0819    | 0.2564    |

|                | df | F-value | P-value |
|----------------|----|---------|---------|
| Survival       | 7  | 65.7556 | <.0001  |
| Mummification  | 7  | 52.4677 | <.0001  |
| Dual mortality | 7  | 1.4282  | 0.2125  |

|               |              |   |         |          |         |        |        |
|---------------|--------------|---|---------|----------|---------|--------|--------|
| Mummification | WI301-33     | 8 | 0.19477 | 0.177378 | 0.06271 | 0.0465 | 0.3431 |
|               | AS3+APSE3    | 8 | 0.08457 | 0.116714 | 0.04126 | -0.013 | 0.1821 |
|               | WA4 $\phi$   | 8 | 0.26972 | 0.196598 | 0.06951 | 0.1054 | 0.4341 |
|               | CJ113 $\phi$ | 8 | 0.34638 | 0.123487 | 0.04366 | 0.2431 | 0.4496 |
|               | WI412-52     | 8 | 0.36913 | 0.198403 | 0.07015 | 0.2033 | 0.535  |
|               | AS3+APSE2    | 8 | 1.01001 | 0.116608 | 0.04123 | 0.9125 | 1.1075 |
|               | G15 $\phi$   | 8 | 1.01435 | 0.078175 | 0.02764 | 0.949  | 1.0797 |
|               | AS3 $\phi$   | 8 | 1.11856 | 0.24305  | 0.08593 | 0.9154 | 1.3218 |

|                |              |   |         |          |         |        |        |
|----------------|--------------|---|---------|----------|---------|--------|--------|
| Dual Mortality | WI301-33     | 8 | 0.21595 | 0.219235 | 0.07751 | 0.0327 | 0.3992 |
|                | AS3+APSE3    | 8 | 0.33271 | 0.158403 | 0.056   | 0.2003 | 0.4651 |
|                | WA4 $\phi$   | 8 | 0.1745  | 0.15614  | 0.0552  | 0.044  | 0.305  |
|                | CJ113 $\phi$ | 8 | 0.30871 | 0.213775 | 0.07558 | 0.13   | 0.4874 |
|                | WI412-52     | 8 | 0.37072 | 0.161536 | 0.05711 | 0.2357 | 0.5058 |
|                | AS3+APSE2    | 8 | 0.22    | 0.209472 | 0.07406 | 0.0449 | 0.3951 |
|                | G15 $\phi$   | 8 | 0.25651 | 0.172447 | 0.06097 | 0.1123 | 0.4007 |
|                | AS3 $\phi$   | 8 | 0.40376 | 0.231232 | 0.08175 | 0.2104 | 0.5971 |

**S1a Table.** Arcsine transformed ANOVA of aphid susceptibility to *Aphidius ervi*.

| Arcsine Transformed | Aphid line   | n | Mean     | Std. Dev. | Std. Err. Mean. | Lower 95% | Upper 95% |
|---------------------|--------------|---|----------|-----------|-----------------|-----------|-----------|
| Survival            | WI301-33     | 9 | 0.338818 | 0.153438  | 0.05115         | 0.22087   | 0.45676   |
|                     | AS3+APSE3    | 8 | 0.281726 | 0.222251  | 0.07858         | 0.09592   | 0.46753   |
|                     | WA4 $\phi$   | 8 | 0.350153 | 0.106043  | 0.03749         | 0.2615    | 0.43881   |
|                     | CJ113 $\phi$ | 8 | 0.3562   | 0.177926  | 0.06291         | 0.20745   | 0.50495   |
|                     | WI412-52     | 8 | 0.13428  | 0.154219  | 0.05452         | 0.00535   | 0.26321   |
|                     | AS3+APSE2    | 8 | 0.303399 | 0.080379  | 0.02842         | 0.2362    | 0.3706    |
|                     | G15 $\phi$   | 8 | 0.248184 | 0.253324  | 0.08956         | 0.0364    | 0.45997   |
|                     | AS3 $\phi$   | 8 | 0.193194 | 0.126423  | 0.0447          | 0.0875    | 0.29889   |

|                | df | F-value | P-value |
|----------------|----|---------|---------|
| Survival       | 7  | 1.8184  | 0.1013  |
| Mummification  | 7  | 2.0828  | 0.0601  |
| Dual mortality | 7  | 2.6081  | 0.0209  |

|               |              |   |          |          |         |         |         |
|---------------|--------------|---|----------|----------|---------|---------|---------|
| Mummification | WI301-33     | 9 | 1.072141 | 0.099134 | 0.03304 | 0.99594 | 1.14834 |
|               | AS3+APSE3    | 8 | 1.09635  | 0.140252 | 0.04959 | 0.9791  | 1.2136  |
|               | WA4 $\phi$   | 8 | 1.087558 | 0.137619 | 0.04866 | 0.97251 | 1.20261 |
|               | CJ113 $\phi$ | 8 | 1.032686 | 0.162034 | 0.05729 | 0.89722 | 1.16815 |
|               | WI412-52     | 8 | 1.24718  | 0.187018 | 0.06612 | 1.09083 | 1.40353 |
|               | AS3+APSE2    | 8 | 1.151146 | 0.123336 | 0.04361 | 1.04803 | 1.25426 |
|               | G15 $\phi$   | 8 | 1.226156 | 0.280197 | 0.09906 | 0.99191 | 1.46041 |
|               | AS3 $\phi$   | 8 | 1.009245 | 0.169432 | 0.0599  | 0.8676  | 1.15089 |

|                |              |   |          |          |         |         |         |
|----------------|--------------|---|----------|----------|---------|---------|---------|
| Dual Mortality | WI301-33     | 9 | 0.304586 | 0.143802 | 0.04793 | 0.19405 | 0.41512 |
|                | AS3+APSE3    | 8 | 0.324922 | 0.079593 | 0.02814 | 0.25838 | 0.39146 |
|                | WA4 $\phi$   | 8 | 0.284355 | 0.17608  | 0.06225 | 0.13715 | 0.43156 |
|                | CJ113 $\phi$ | 8 | 0.338951 | 0.170478 | 0.06027 | 0.19643 | 0.48147 |
|                | WI412-52     | 8 | 0.234032 | 0.208503 | 0.07372 | 0.05972 | 0.40834 |
|                | AS3+APSE2    | 8 | 0.244484 | 0.170592 | 0.06031 | 0.10187 | 0.3871  |
|                | G15 $\phi$   | 8 | 0.186528 | 0.164135 | 0.05803 | 0.04931 | 0.32375 |
|                | AS3 $\phi$   | 8 | 0.498296 | 0.178005 | 0.06293 | 0.34948 | 0.64711 |

**S1b Table.** Arcsine transformed ANOVA of aphid susceptibility to *Praon pequodorum*.

| Arcsine Transformed     | Aphid line   | n | Mean     | Std. Dev. | Std. Err. Mean. | Lower 95% | Upper 95% |
|-------------------------|--------------|---|----------|-----------|-----------------|-----------|-----------|
| Control lines mortality | WI301-33     | 4 | 0.193194 | 0.136553  | 0.06828         | -0.0241   | 0.41048   |
|                         | AS3+APSE3    | 4 | 0.193194 | 0.136553  | 0.06828         | -0.0241   | 0.41048   |
|                         | WA4 $\phi$   | 4 | 0.080438 | 0.160875  | 0.08044         | -0.1756   | 0.33643   |
|                         | CJ113 $\phi$ | 4 | 0.056378 | 0.112757  | 0.05638         | -0.123    | 0.2358    |
|                         | WI412-52     | 4 | 0.249573 | 0.048119  | 0.02406         | 0.173     | 0.32614   |
|                         | AS3+APSE2    | 4 | 0.193194 | 0.136553  | 0.06828         | -0.0241   | 0.41048   |
|                         | G15 $\phi$   | 4 | 0.193194 | 0.136553  | 0.06828         | -0.0241   | 0.41048   |
|                         | AS3 $\phi$   | 4 | 0.354612 | 0.268482  | 0.13424         | -0.0726   | 0.78183   |

|                   | df | F-value | P-value |
|-------------------|----|---------|---------|
| Control Mortality | 7  | 1.4754  | 0.2231  |

**S1c Table.** Arcsine transformed ANOVA of aphid mortality in the unparasitized control lines.
